# Supplementary material
Source: publisher figshare collection journal article supplement (https://acs.figshare.com/ndownloader/files/5194423)

<sup>1</sup>H NMR spectra of compounds 11-14 (from top to bottom; D<sub>2</sub>O, 500 MHz)

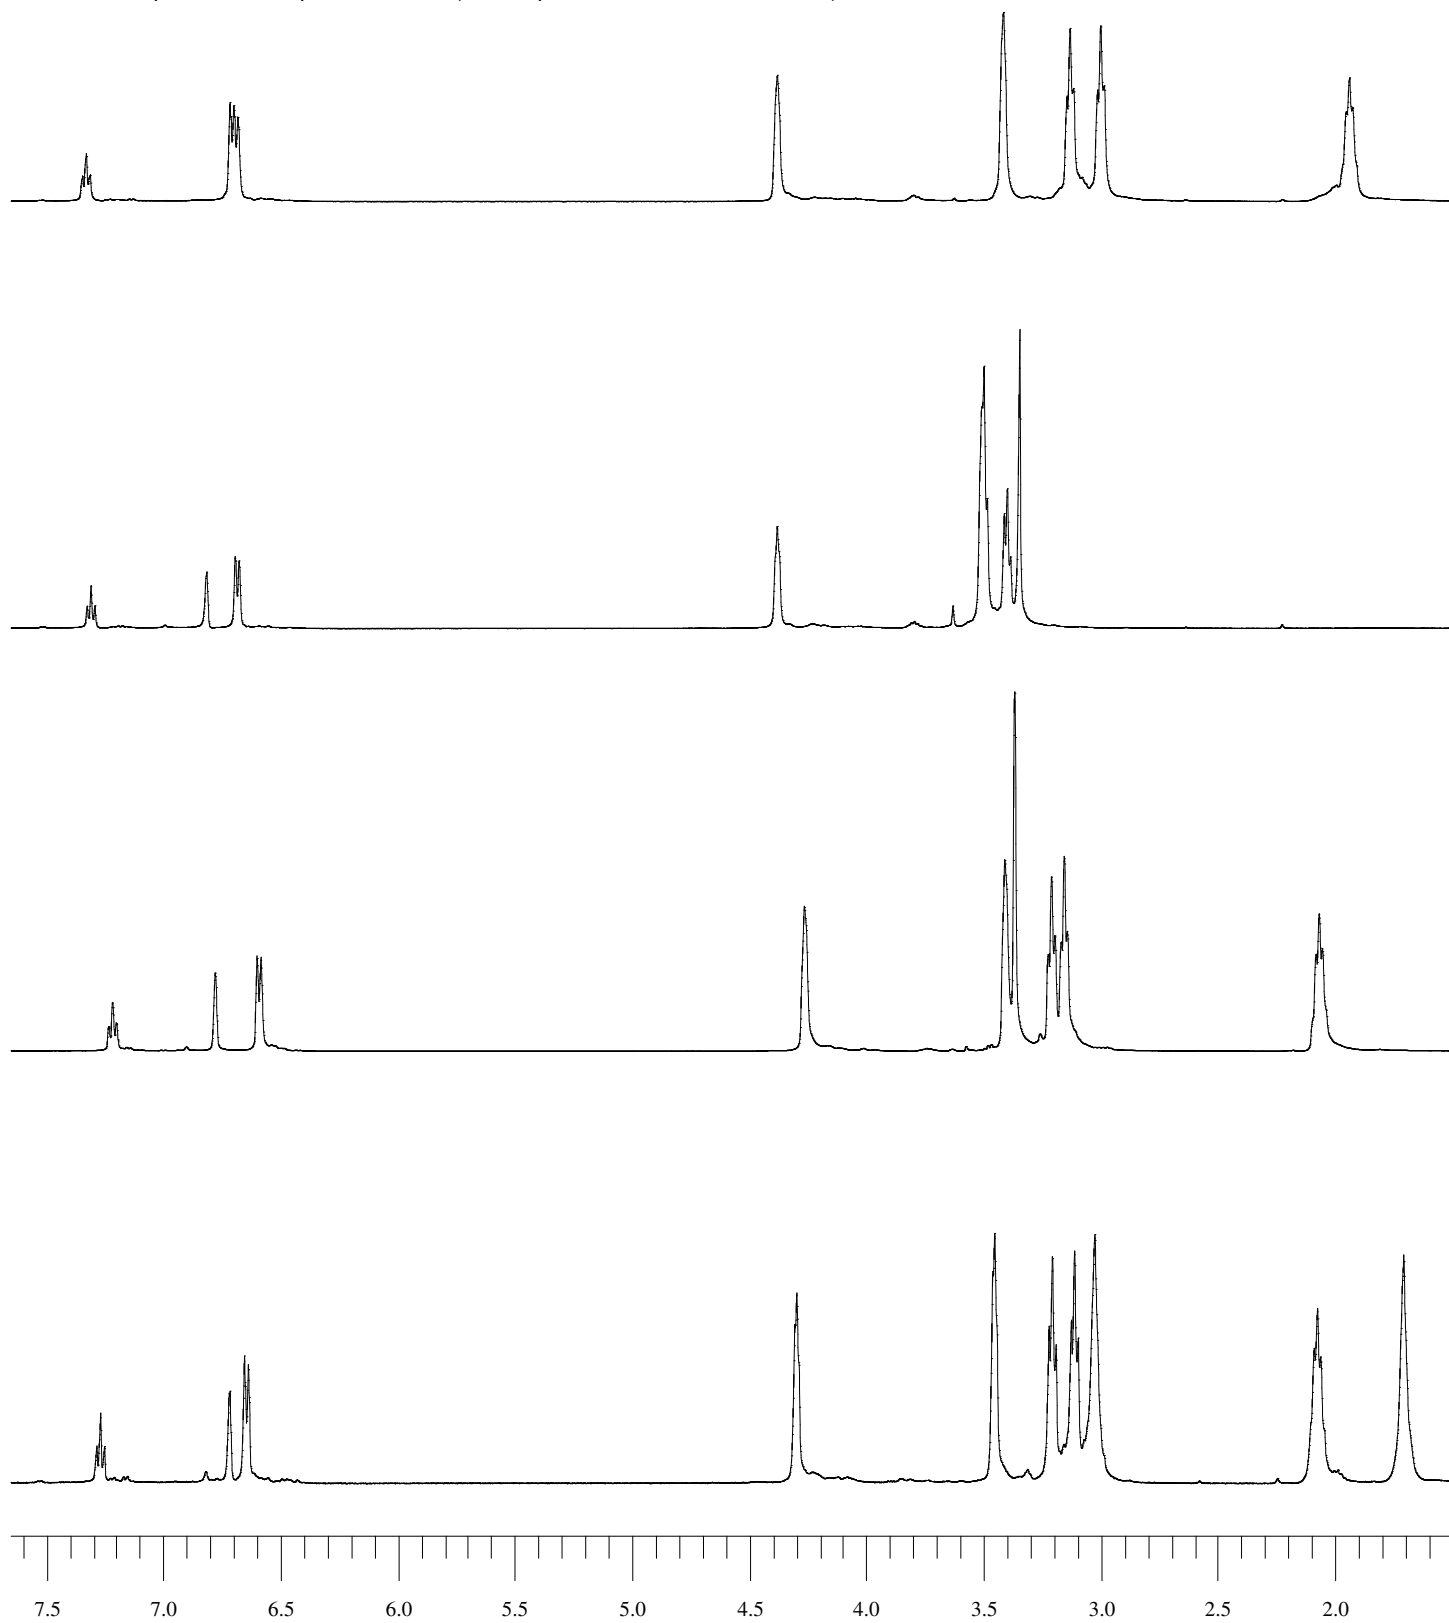

Supplement: Supplementary file 1 [file 5194423]
